# Supplementary material
Source: Royal Society of Chemistry journal article supplement (doi:10.1039/d6ob00588h)
Supplement: d6ob00588h1.pdf [file d6ob00588h1.pdf]

Supplementary information (SI)

Homo- and heterotypic pentameric cyclophanes exhibiting fascinating  
host-guest binding properties

*Osamu Hayashida\**, *Hayato Saruwatari*, *Syota Minami*, and *Takaaki Miyazaki*  
Department of Chemistry, Faculty of Science, Fukuoka University, 8-19-1 Nanakuma,  
Fukuoka 814-0180, Japan

| <b>Table of Contents</b>                                                                                                                                          | <b>Page:</b> |
|-------------------------------------------------------------------------------------------------------------------------------------------------------------------|--------------|
| <b>Fig. S1.</b> Computer-generated CPK models of <b>L</b> , <b>S</b> and guests                                                                                   | S3           |
| <b>Fig. S2.</b> $^1\text{H}$ NMR spectrum of <b>L1-Boc</b>                                                                                                        | S4           |
| <b>Fig. S3.</b> $^{13}\text{C}\{^1\text{H}\}$ NMR spectrum of <b>L1-Boc</b>                                                                                       | S5           |
| <b>Fig. S4.</b> MALDI-TOF MS spectra of <b>L1-Boc</b>                                                                                                             | S6           |
| <b>Fig. S5.</b> $^1\text{H}$ NMR spectrum of <b>L1</b>                                                                                                            | S7           |
| <b>Fig. S6.</b> $^{13}\text{C}\{^1\text{H}\}$ spectrum of <b>L1</b>                                                                                               | S8           |
| <b>Fig. S7.</b> MALDI-TOF MS spectra of <b>L1</b>                                                                                                                 | S9           |
| <b>Fig. S8.</b> $^1\text{H}$ NMR spectrum of <b>hetero5-Boc</b>                                                                                                   | S10          |
| <b>Fig. S9.</b> $^{13}\text{C}\{^1\text{H}\}$ spectrum of <b>hetero5-Boc</b>                                                                                      | S11          |
| <b>Fig. S10.</b> MALDI-TOF MS spectra of <b>hetero5-Boc</b>                                                                                                       | S12          |
| <b>Fig. S11.</b> $^1\text{H}$ NMR spectrum of <b>hetero5</b>                                                                                                      | S13          |
| <b>Fig. S12.</b> $^{13}\text{C}\{^1\text{H}\}$ spectrum of <b>hetero5</b>                                                                                         | S14          |
| <b>Fig. S13.</b> MALDI-TOF MS spectra of <b>hetero5</b>                                                                                                           | S15          |
| <b>Fig. S14.</b> $^1\text{H}$ NMR spectrum of <b>L5-Boc</b>                                                                                                       | S16          |
| <b>Fig. S15.</b> $^{13}\text{C}\{^1\text{H}\}$ spectrum of <b>L5-Boc</b>                                                                                          | S17          |
| <b>Fig. S16.</b> MALDI-TOF MS spectra of <b>L5-Boc</b>                                                                                                            | S18          |
| <b>Fig. S17.</b> $^1\text{H}$ NMR spectrum of <b>L5</b>                                                                                                           | S19          |
| <b>Fig. S18.</b> $^{13}\text{C}\{^1\text{H}\}$ spectrum of <b>L5</b>                                                                                              | S20          |
| <b>Fig. S19.</b> MALDI-TOF MS spectra of <b>L5</b>                                                                                                                | S21          |
| <b>Fig. S20.</b> Fitting of fluorescence titration data (PBA)                                                                                                     | S22          |
| <b>Fig. S21.</b> Fitting of fluorescence titration data (PeDA)                                                                                                    | S24          |
| <b>Fig. S22.</b> Fitting of fluorescence titration data (TNS)                                                                                                     | S26          |
| <b>Fig. S23.</b> Fitting of fluorescence titration data (CDab)                                                                                                    | S28          |
| <b>Fig. S24.</b> Fluorescence spectral changes of PBA upon the addition of CDab in the absence (a) and presence of <b>S1</b> (b), <b>L1</b> (c) and <b>L5</b> (d) | S30          |

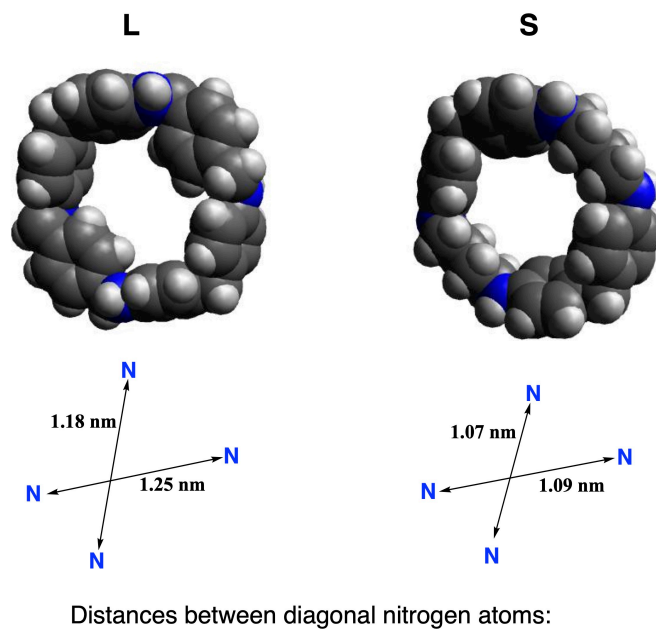

*Stocky guests*

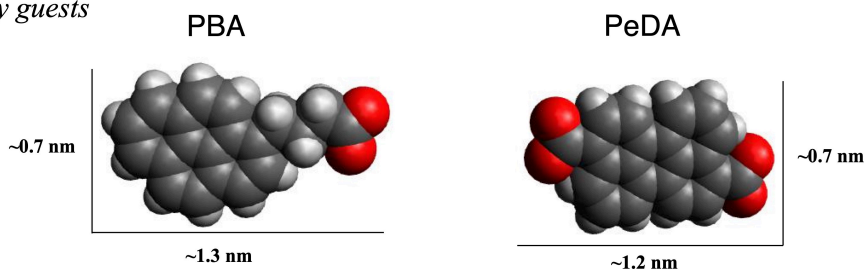

*Elongated guests*

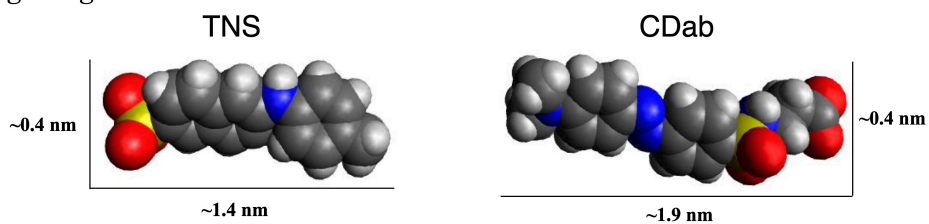

**Fig. S1** Computer-generated CPK models of **L**, **S** and guests (PBA, PeDA, TNS and CDab) (Avogadro 1.2.0 software). Distances between diagonal nitrogen atoms are shown. Carbon, hydrogen, and nitrogen atoms are shown in gray, cloudy white, and blue, respectively.

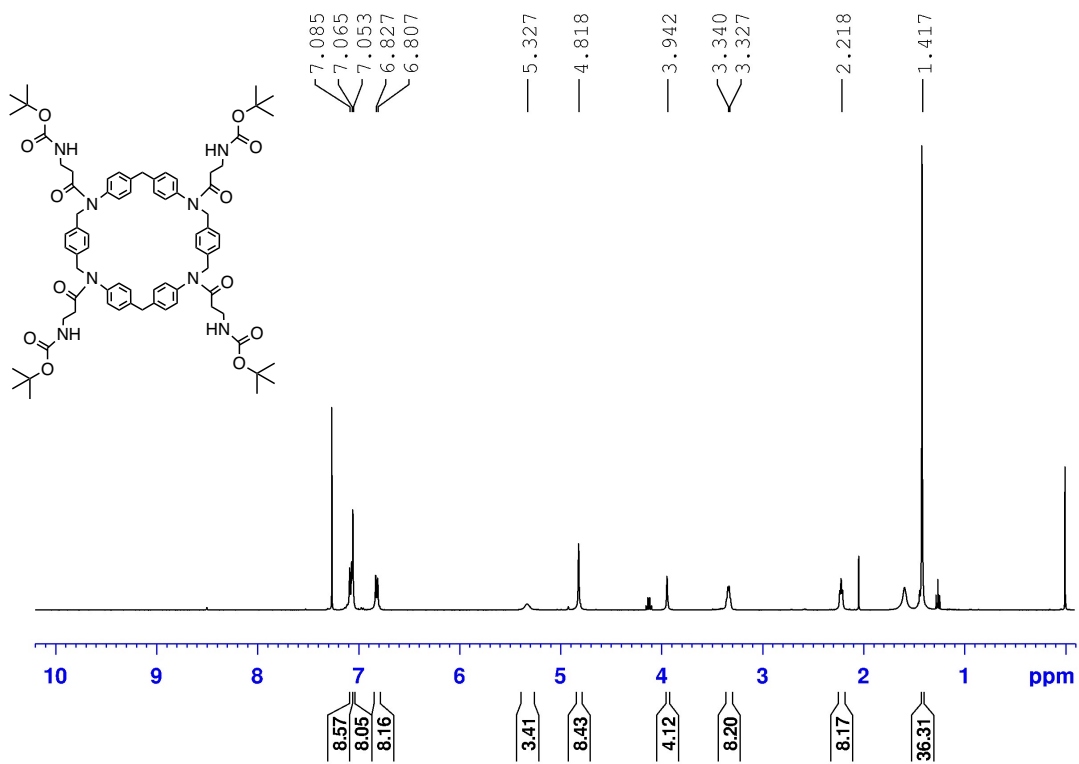

**Fig. S2** <sup>1</sup>H NMR spectrum of **L1-Boc** (400 MHz, CDCl<sub>3</sub>, 298K).

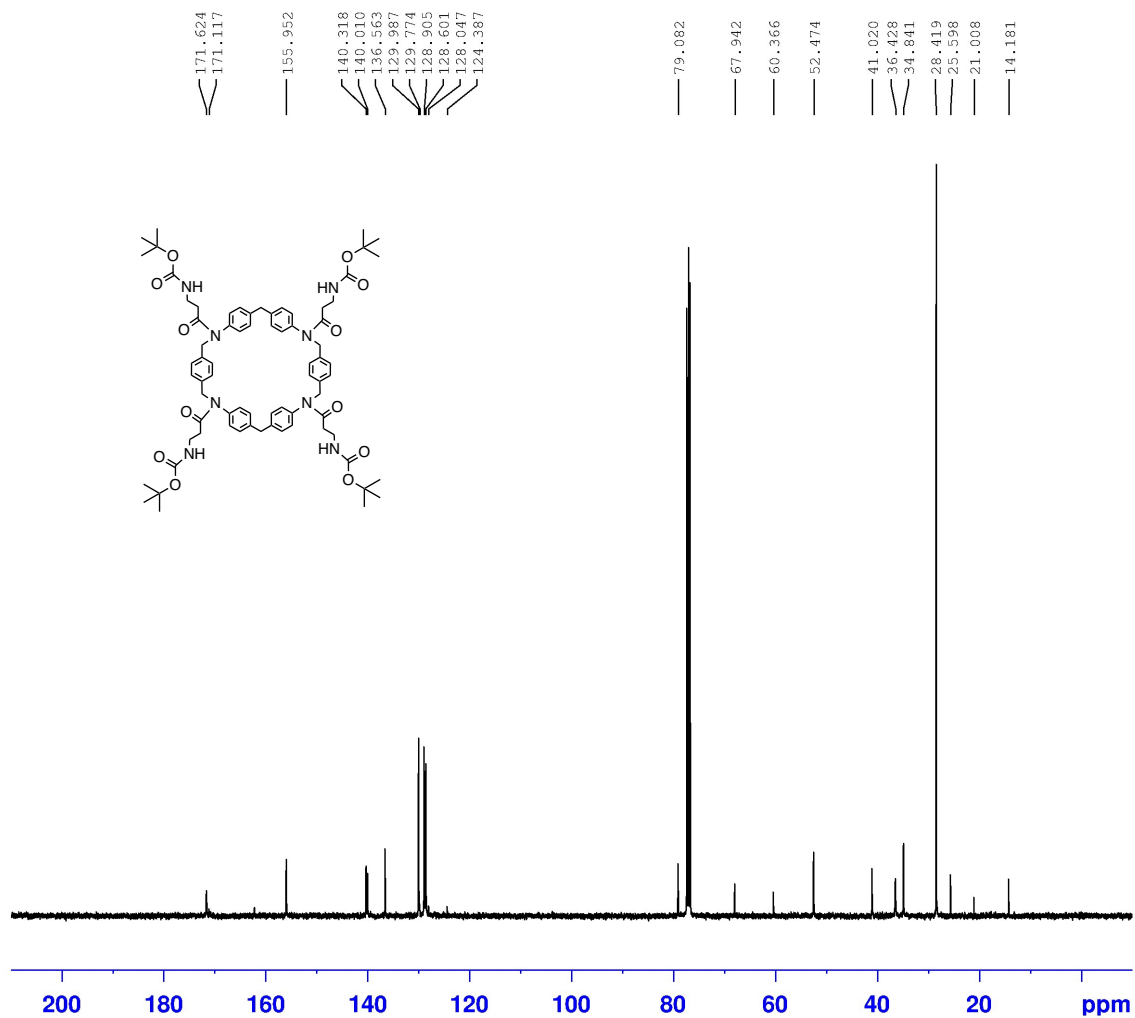

**Fig. S3**  $^{13}\text{C}\{^1\text{H}\}$  NMR spectrum of L1-Boc (100 MHz,  $\text{CDCl}_3$ , 298K).

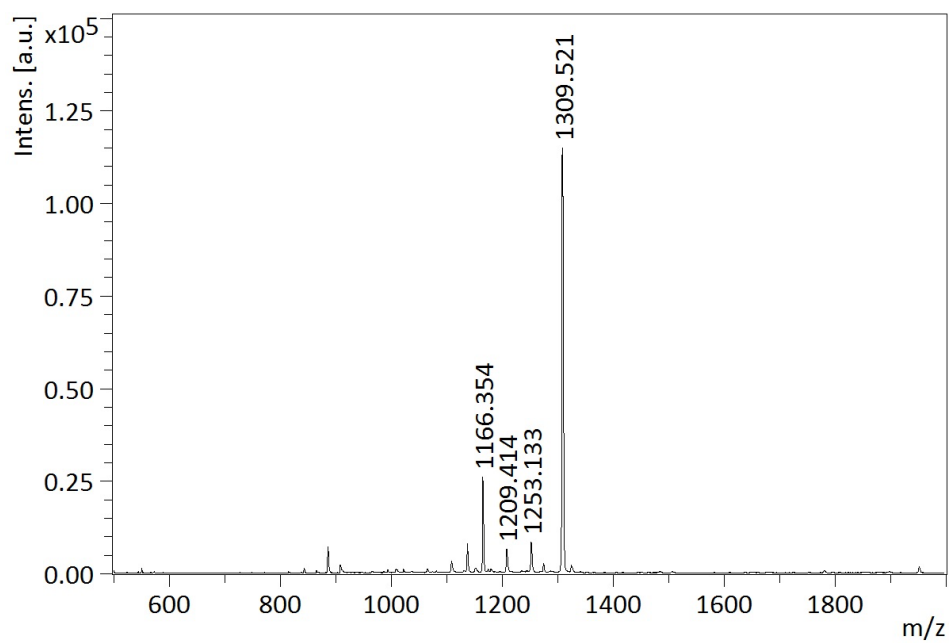

**Fig. S4** MALDI-TOF MS spectra of **L1-Boc**.

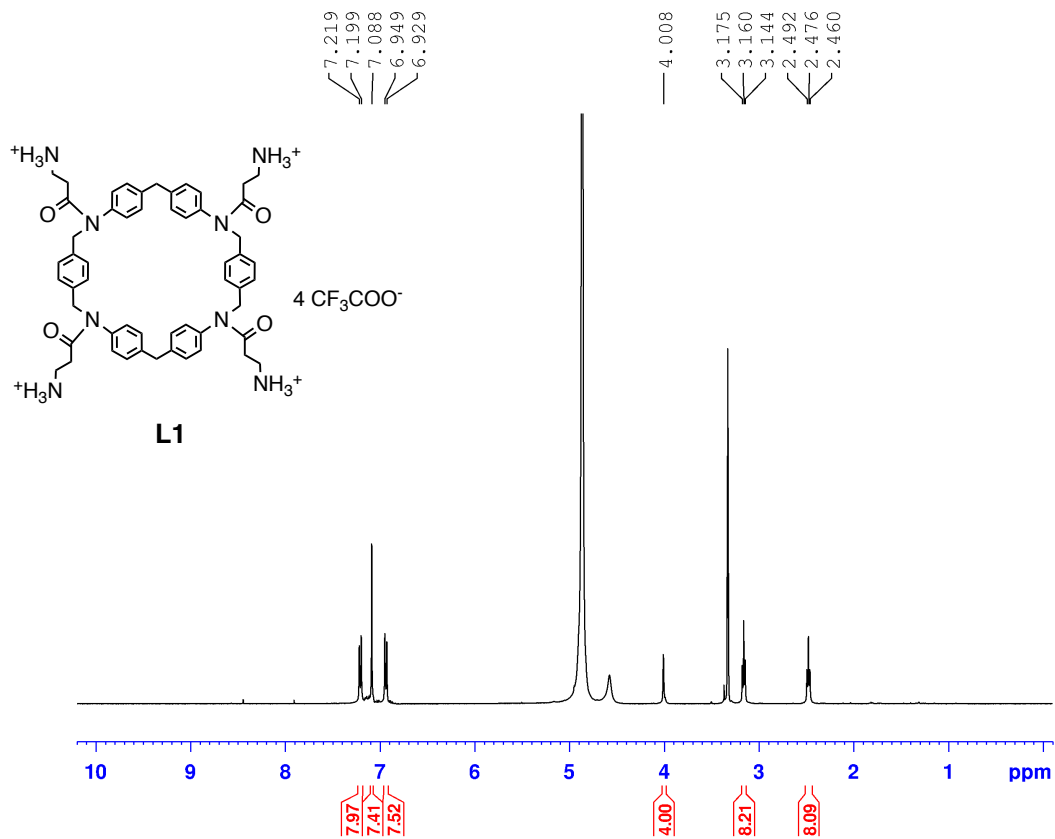

**Fig. S5**  $^1\text{H}$  NMR spectrum of **L1** (400 MHz,  $\text{CD}_3\text{OD}$ , 298K).

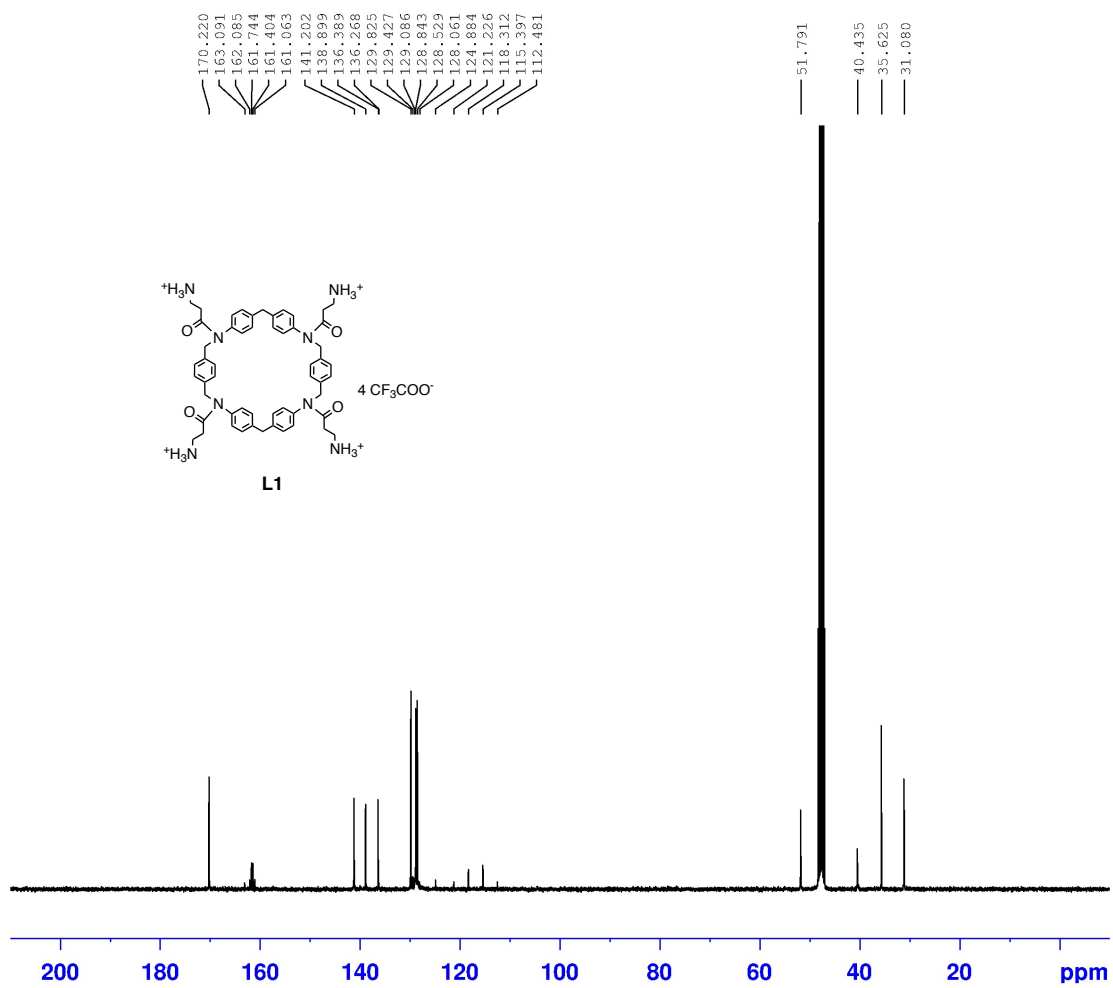

**Fig. S6**  $^{13}\text{C}\{^1\text{H}\}$  NMR spectrum of L1 (100 MHz,  $\text{CD}_3\text{OD}$ , 298K).

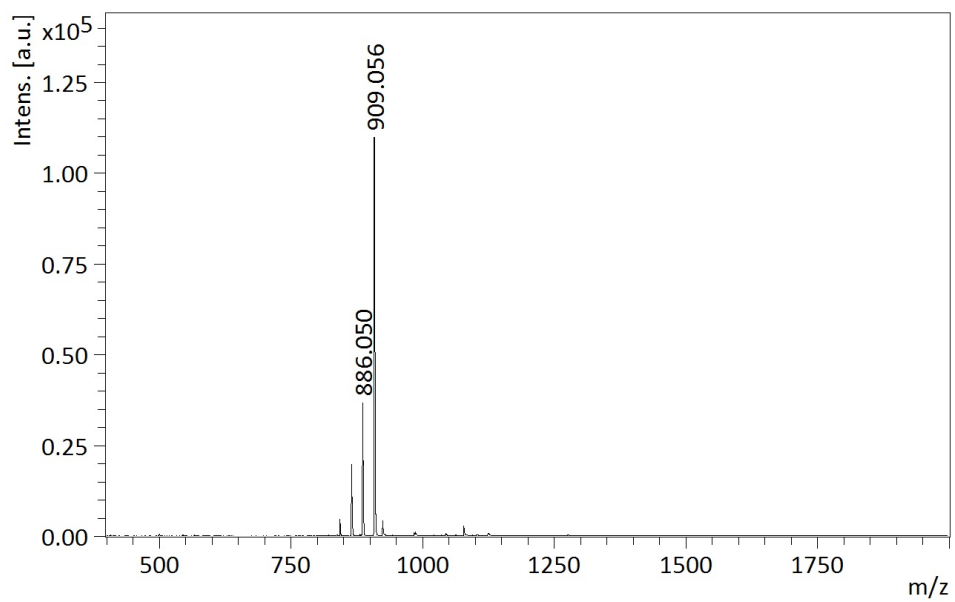

**Fig. S7** MALDI-TOF MS spectra of **L1**.

]]

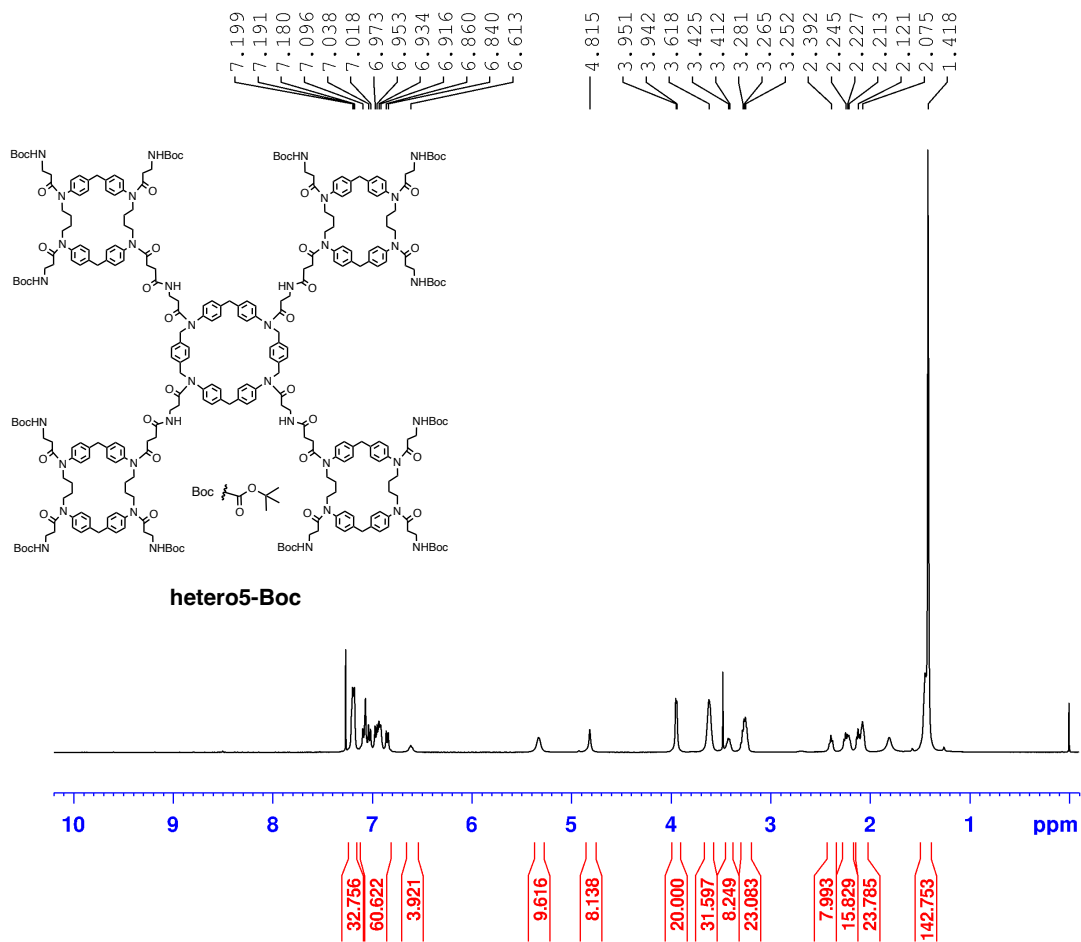

**Fig. S8**  $^1\text{H}$  NMR spectrum of **hetero5-Boc** (400 MHz,  $\text{CDCl}_3$ , 298K).

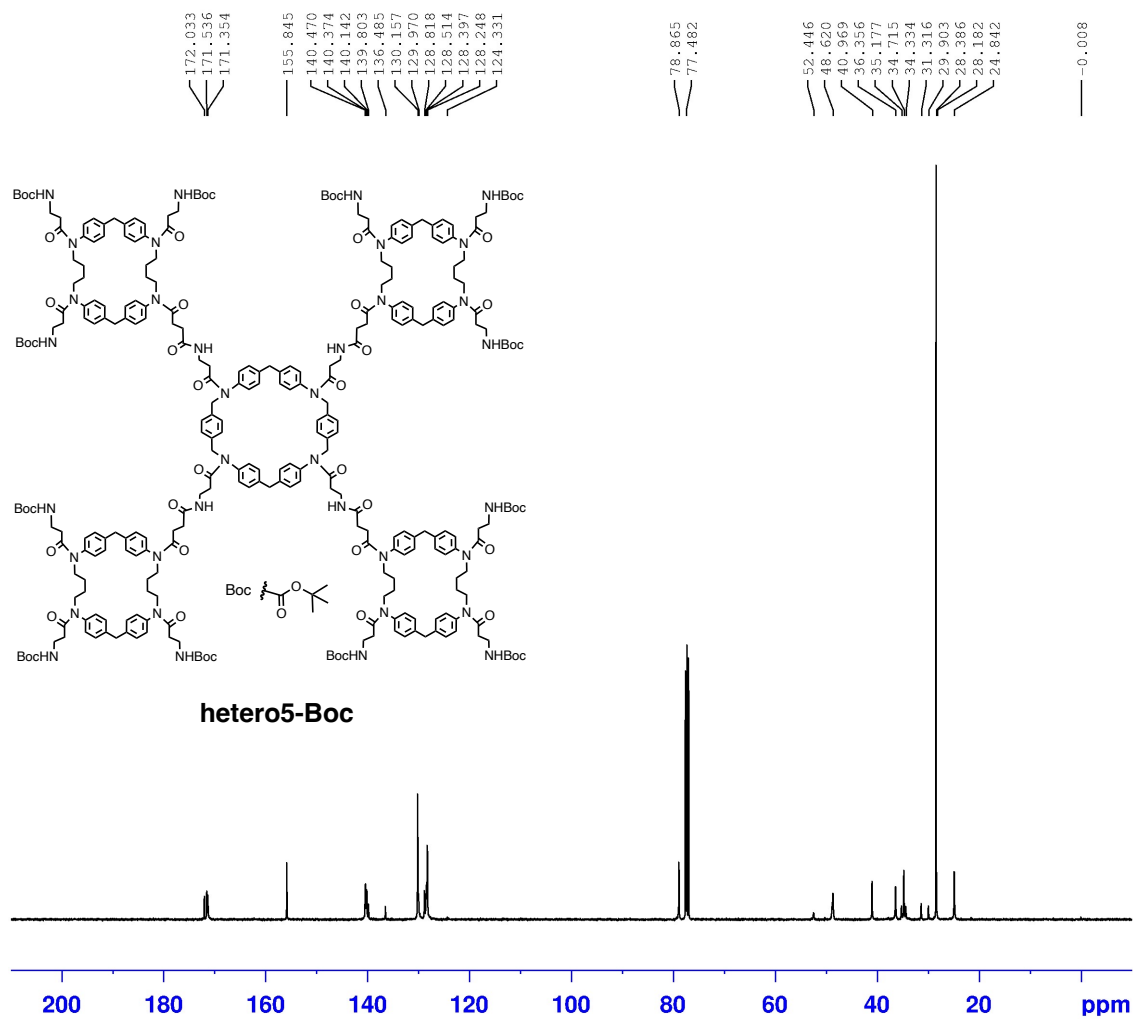

**Fig. S9** <sup>13</sup>C{<sup>1</sup>H} NMR spectrum of **hetero5-Boc** (100 MHz, CDCl<sub>3</sub>, 298K).

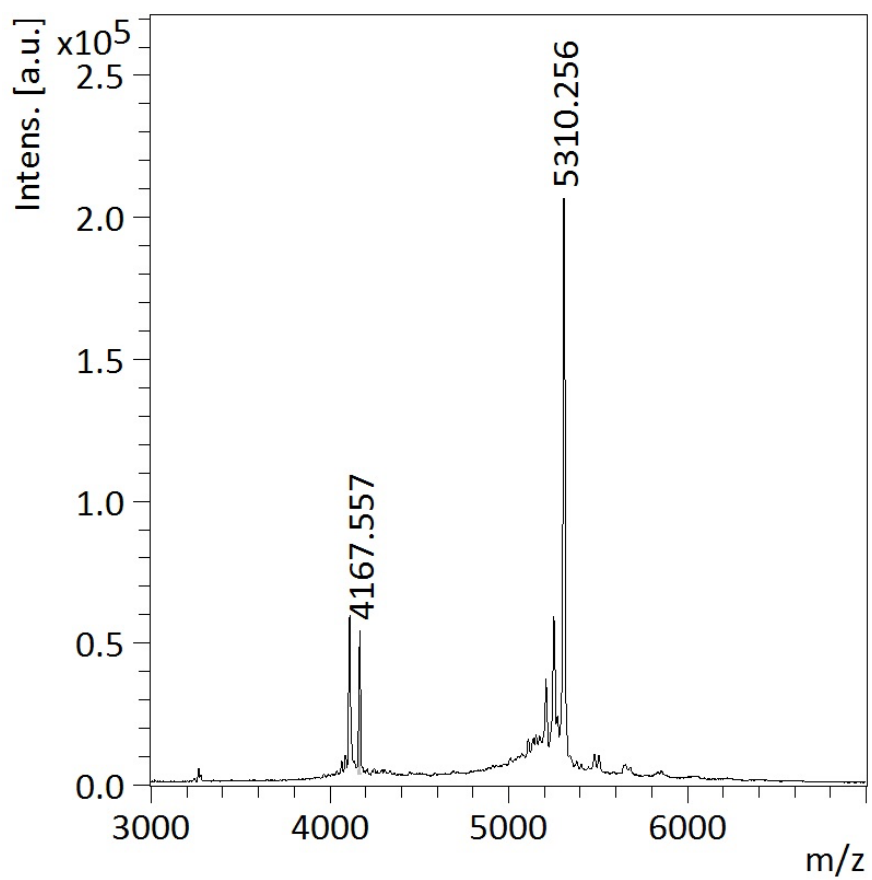

**Fig. S10** MALDI-TOF MS spectra of **hetero5-Boc**.

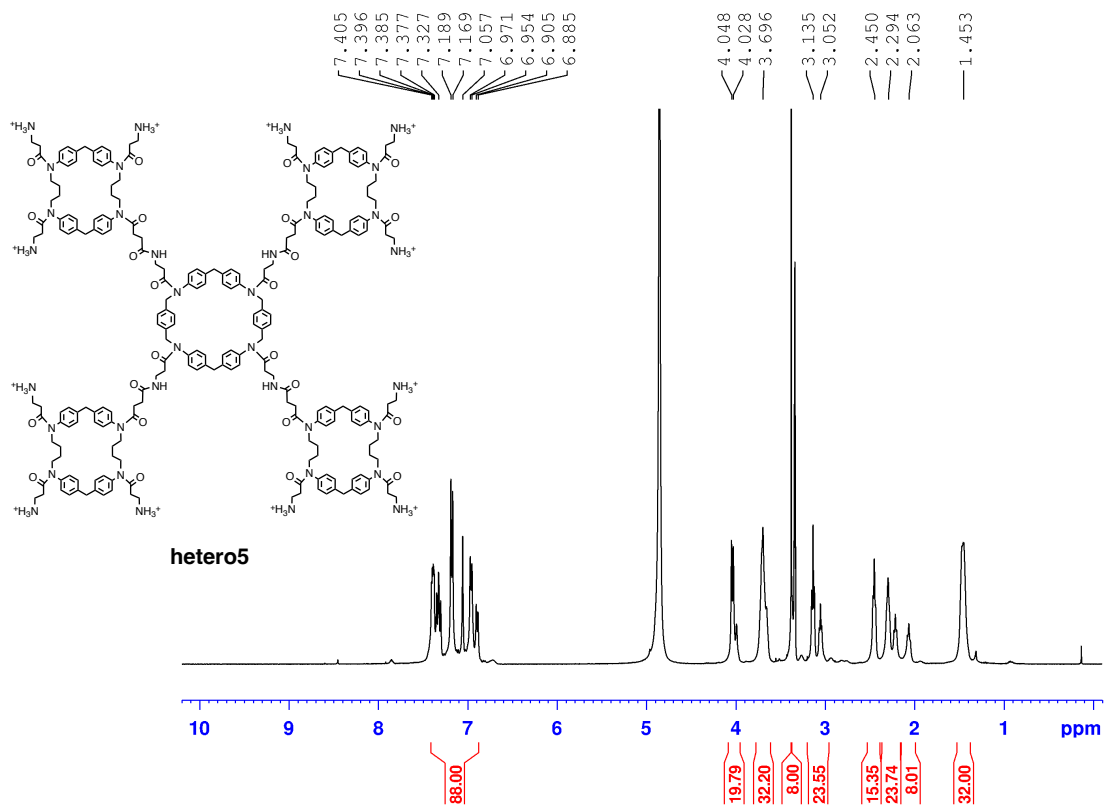

**Fig. S11**  $^1\text{H}$  NMR spectrum of **hetero5** (400 MHz,  $\text{CD}_3\text{OD}$ , 298K).

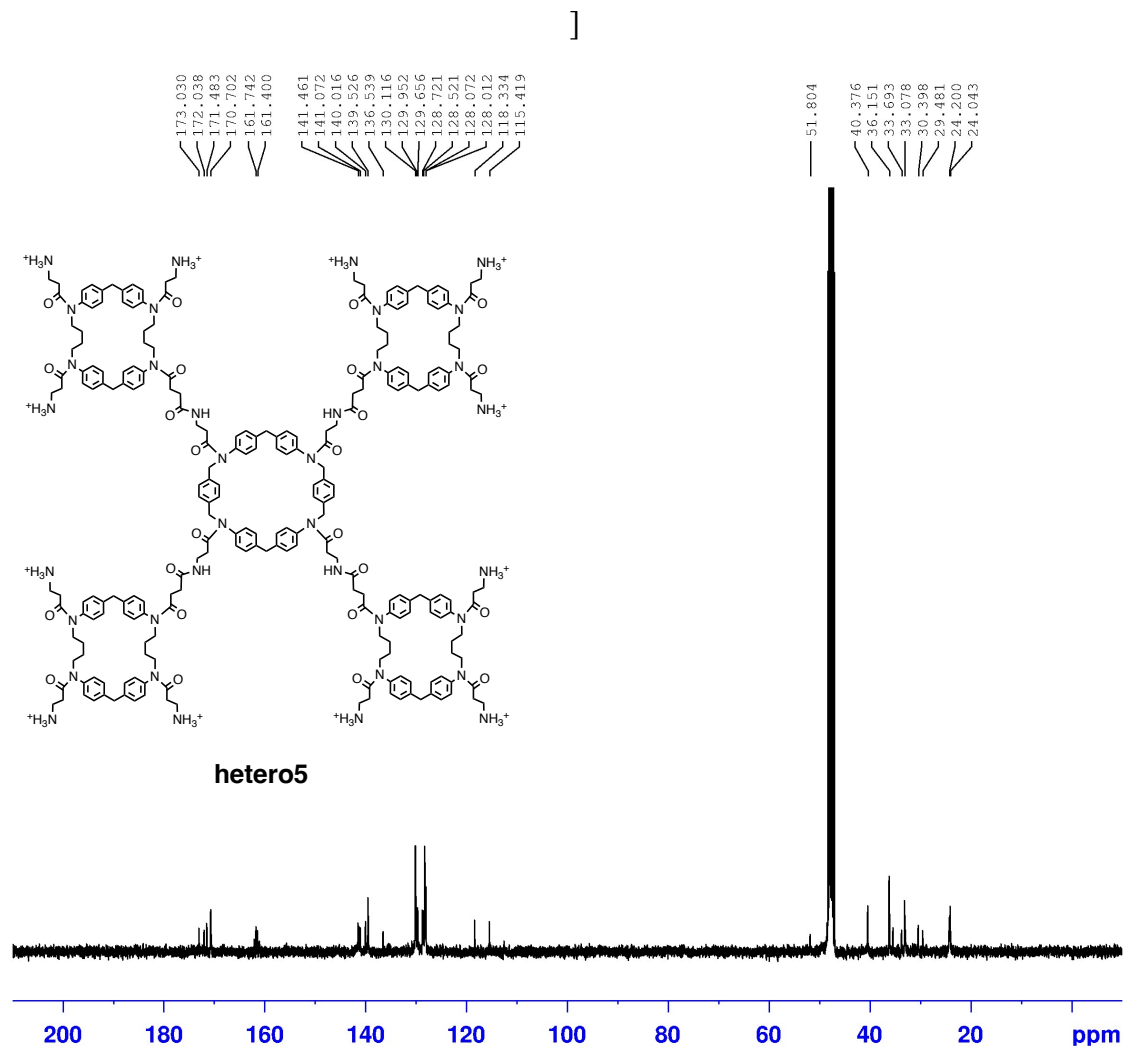

**Fig. S12**  $^{13}\text{C}\{^1\text{H}\}$  NMR spectrum of **hetero5** (100 MHz,  $\text{CD}_3\text{OD}$ , 298K).

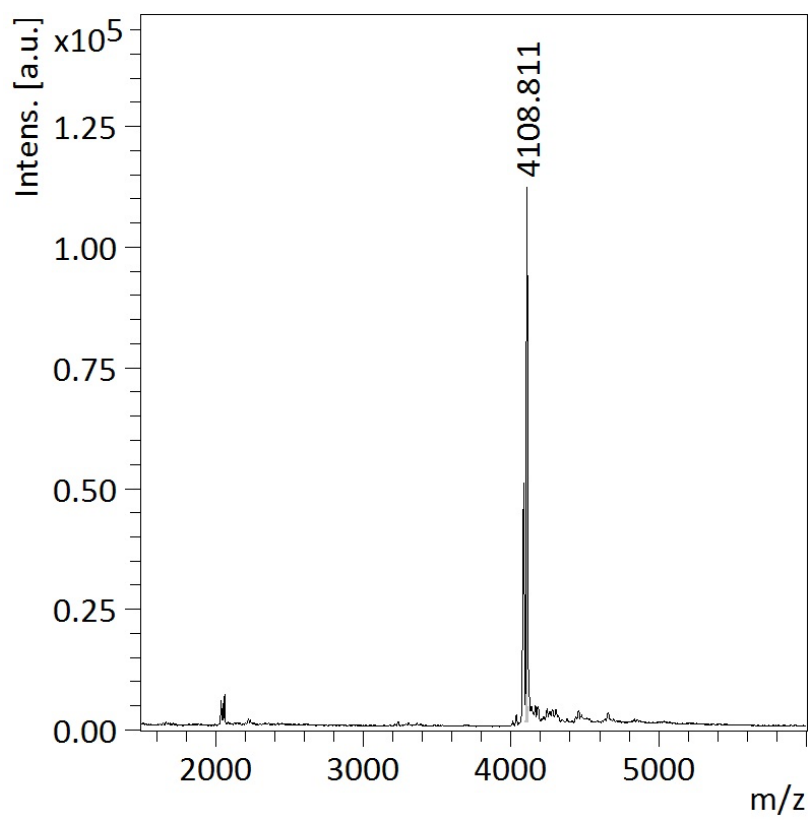

**Fig. S13** MALDI-TOF MS spectra of **hetero5**.

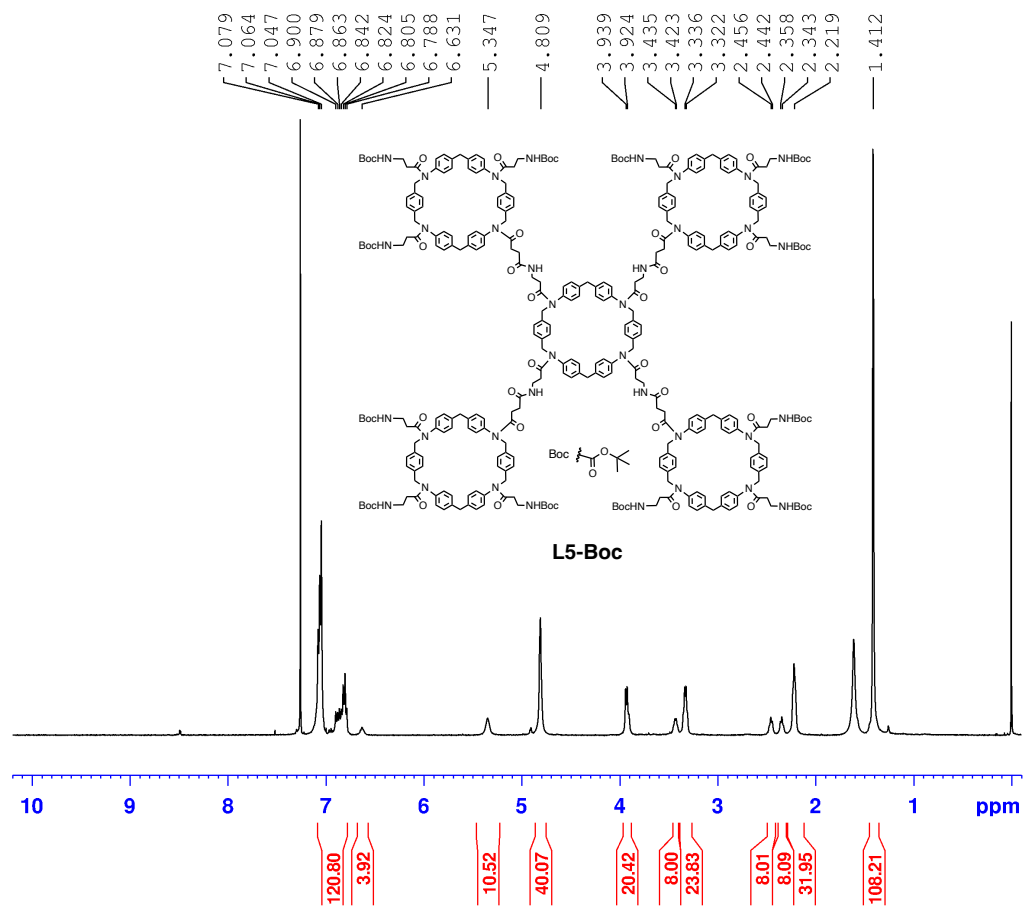

**Fig. S14** <sup>1</sup>H NMR spectrum of L5-Boc (400 MHz, CDCl<sub>3</sub>, 298K).

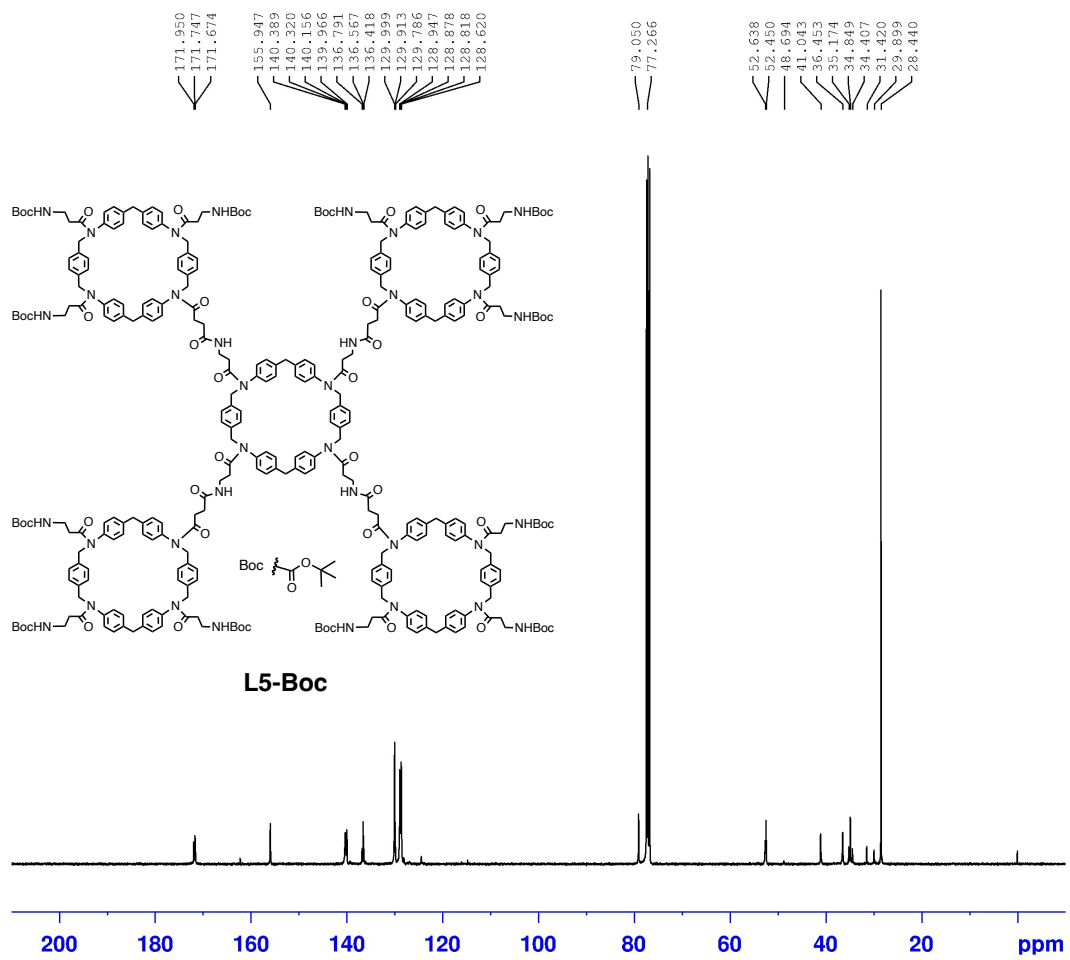

**Fig. S15**  $^{13}\text{C}\{^1\text{H}\}$  NMR spectrum of **L5-Boc** (100 MHz,  $\text{CDCl}_3$ , 298K).

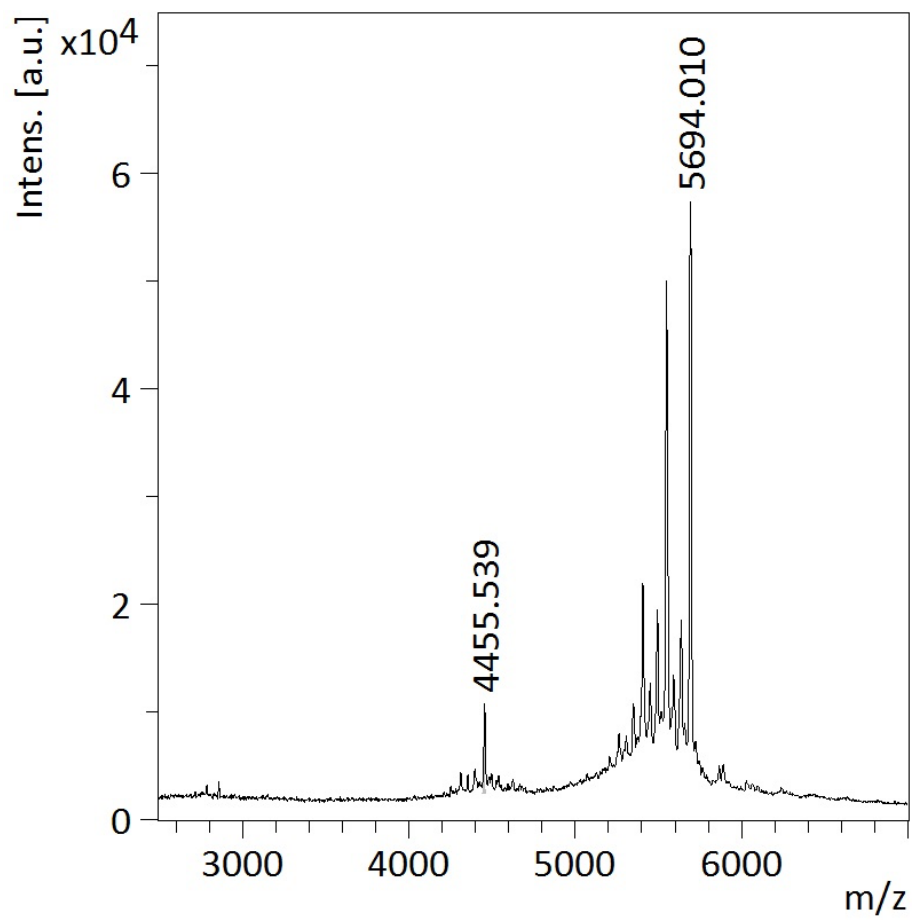

**Fig. S16** MALDI-TOF MS spectra of **L5-Boc**

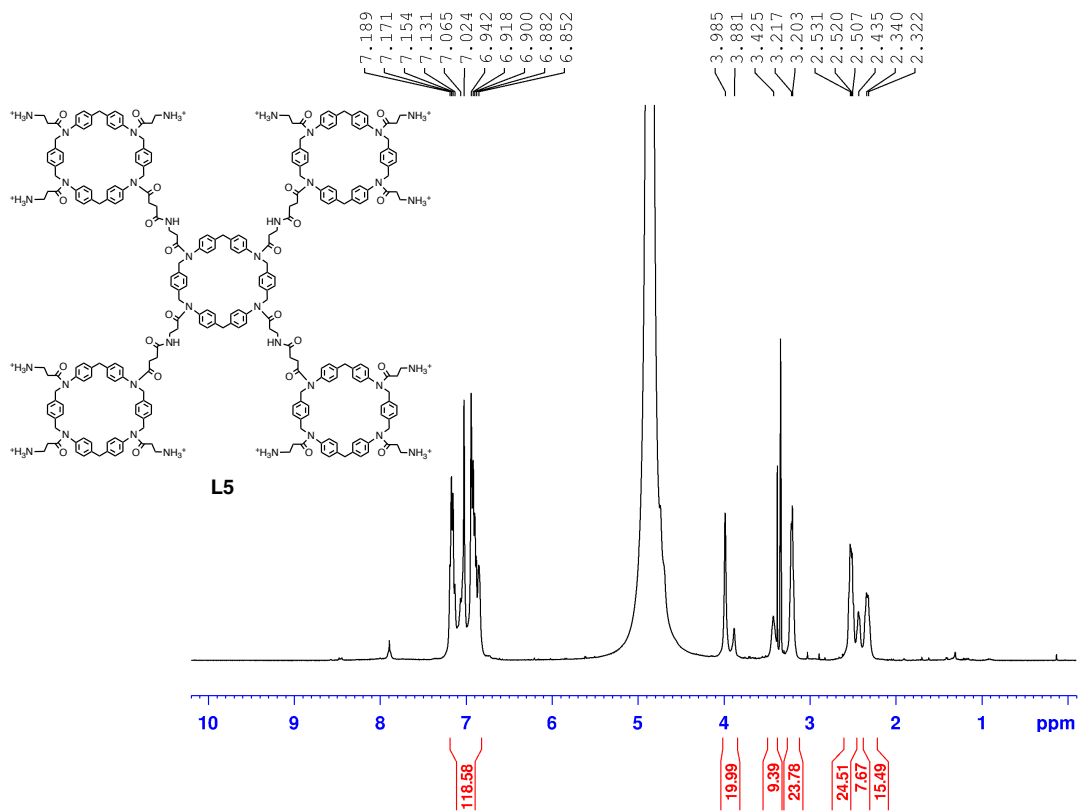

**Fig. S17**  $^1\text{H}$  NMR spectrum of **L5** (400 MHz,  $\text{CD}_3\text{OD}$ , 298K)

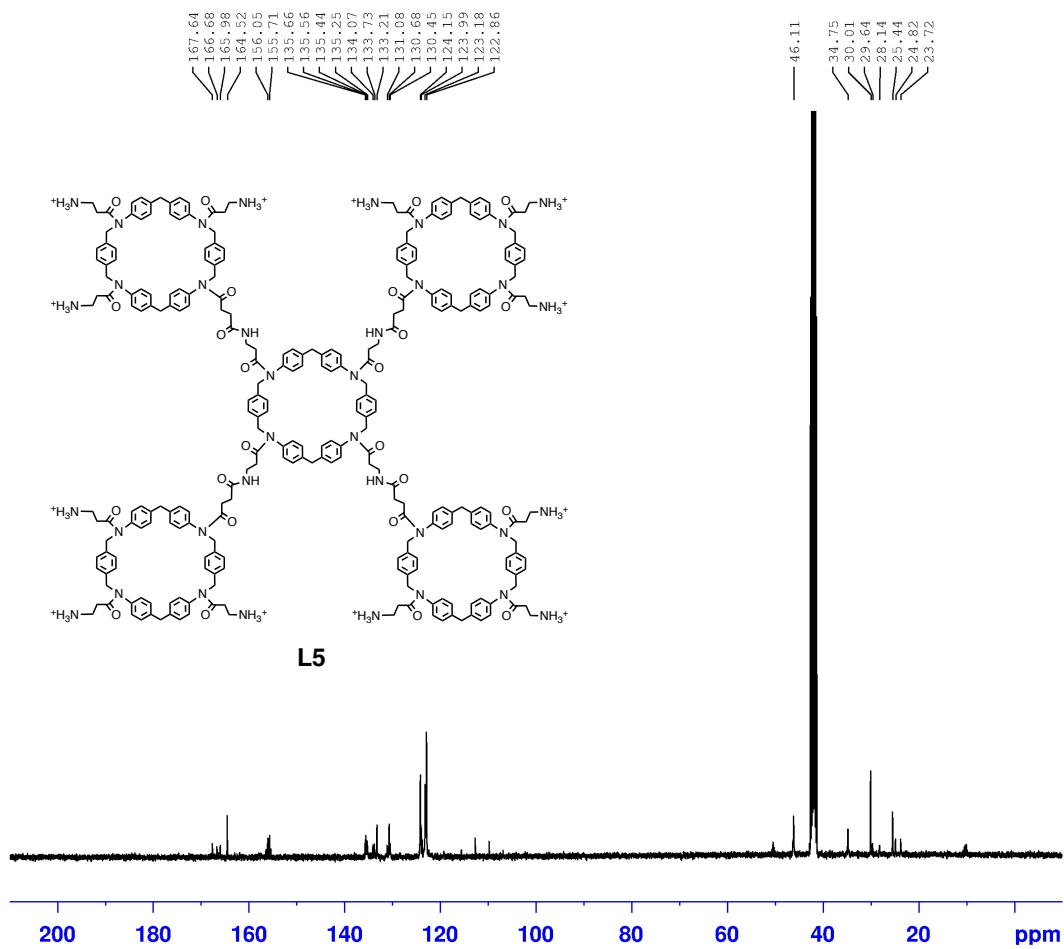

**Fig. S18**  $^{13}\text{C}\{^1\text{H}\}$  spectrum of L5 (100 MHz, CD<sub>3</sub>OD, 298K)

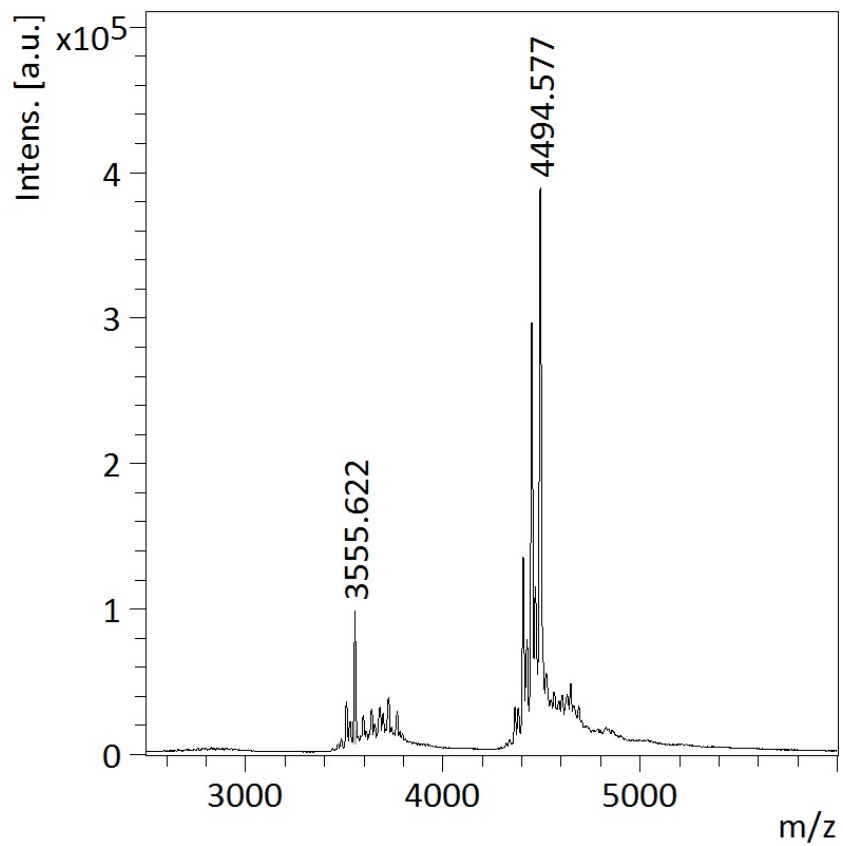

**Fig. S19** MALDI-TOF MS spectra of **L5**

Fitter: UV 1:1   Fit   Summary   Save

**Details**

Time to fit: 0.1185 s  
 SSR: 178.4639  
 Fitted datapoints: 11  
 Fitted params: 2

**Parameters**

| Parameter (bounds) | Optimised                   | Error         | Initial                     |
|--------------------|-----------------------------|---------------|-----------------------------|
| K (0 → ∞)          | 63043.63<br>M <sup>-1</sup> | ± 6.0849<br>% | 10000.00<br>M <sup>-1</sup> |

Back   Next

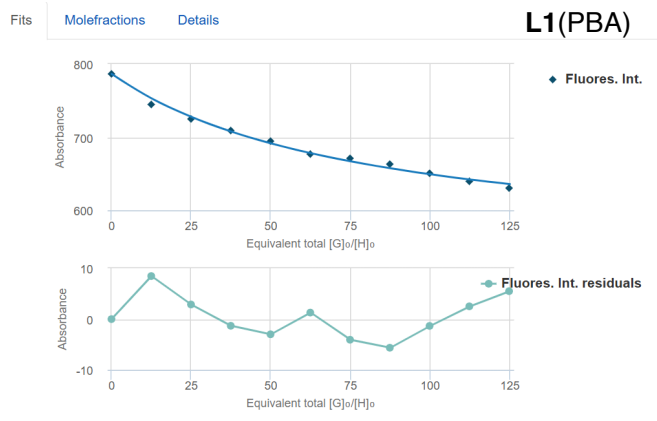

Fitter: UV 1:1   Fit   Summary   Save

**Details**

Time to fit: 0.1213 s  
 SSR: 85.3308  
 Fitted datapoints: 11  
 Fitted params: 2

**Parameters**

| Parameter (bounds) | Optimised                   | Error         | Initial                     |
|--------------------|-----------------------------|---------------|-----------------------------|
| K (0 → ∞)          | 44644.13<br>M <sup>-1</sup> | ± 6.5820<br>% | 10000.00<br>M <sup>-1</sup> |

Back   Next

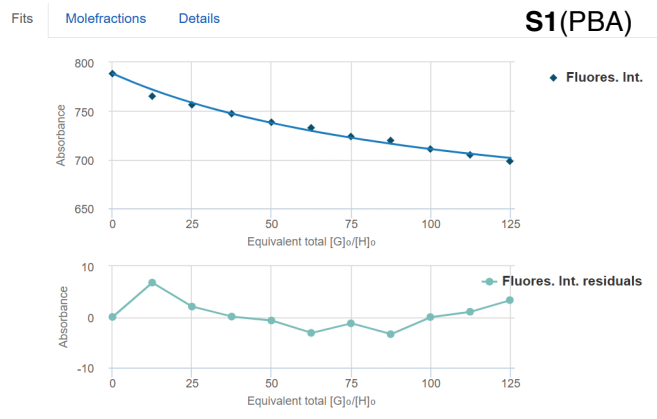



Fitter: UV 1:1   Fit   Summary   Save

**Details**

Time to fit: 0.1220 s  
 SSR: 41.0400  
 Fitted datapoints: 11  
 Fitted params: 2

**Parameters**

| Parameter (bounds) | Optimised                   | Error         | Initial                     |
|--------------------|-----------------------------|---------------|-----------------------------|
| K ( 0 → ∞ )        | 76856.43<br>M <sup>-1</sup> | ± 3.2679<br>% | 10000.00<br>M <sup>-1</sup> |

Back   Next

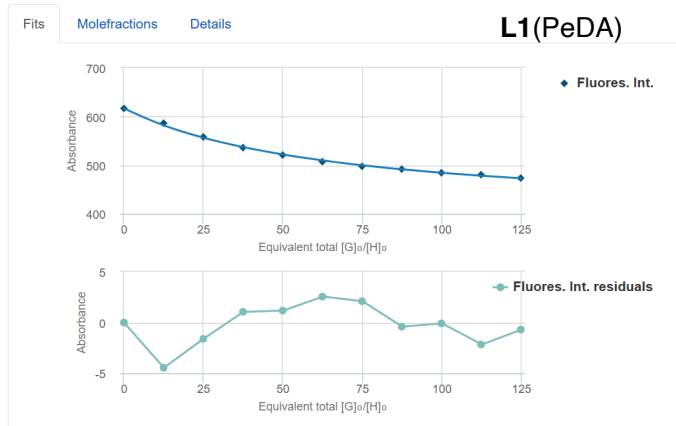

Fitter: UV 1:1   Fit   Summary   Save

**Details**

Time to fit: 0.1169 s  
 SSR: 16.2641  
 Fitted datapoints: 11  
 Fitted params: 2

**Parameters**

| Parameter (bounds) | Optimised                   | Error         | Initial                     |
|--------------------|-----------------------------|---------------|-----------------------------|
| K ( 0 → ∞ )        | 18145.66<br>M <sup>-1</sup> | ± 6.4854<br>% | 10000.00<br>M <sup>-1</sup> |

Back   Next

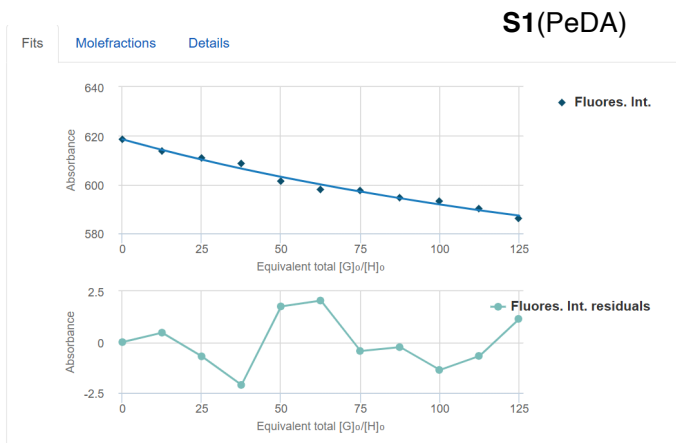



Fitter: UV 1:1   Fit   Summary   Save

**Details**

Time to fit: 0.1214 s  
 SSR: 1.5267e-2  
 Fitted datapoints: 11  
 Fitted params: 2

**Parameters**

| Parameter (bounds) | Optimised                  | Error         | Initial                     |
|--------------------|----------------------------|---------------|-----------------------------|
| K ( 0 → ∞ )        | 6172.46<br>M <sup>-1</sup> | ± 1.7303<br>% | 10000.00<br>M <sup>-1</sup> |

Back   Next

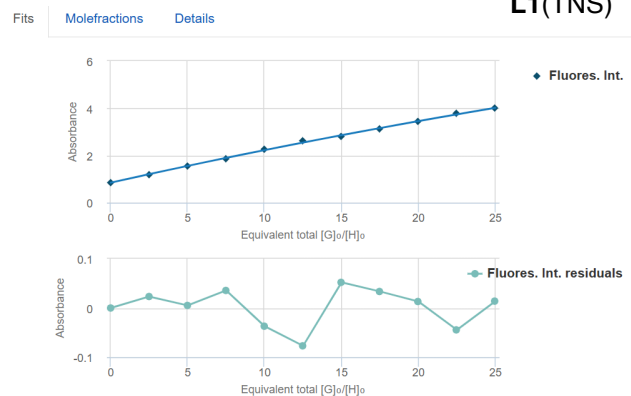

Fitter: UV 1:1   Fit   Summary   Save

**Details**

Time to fit: 0.1203 s  
 SSR: 2.1074e-2  
 Fitted datapoints: 11  
 Fitted params: 2

**Parameters**

| Parameter (bounds) | Optimised                   | Error         | Initial                     |
|--------------------|-----------------------------|---------------|-----------------------------|
| K ( 0 → ∞ )        | 21391.35<br>M <sup>-1</sup> | ± 1.5460<br>% | 10000.00<br>M <sup>-1</sup> |

Back   Next

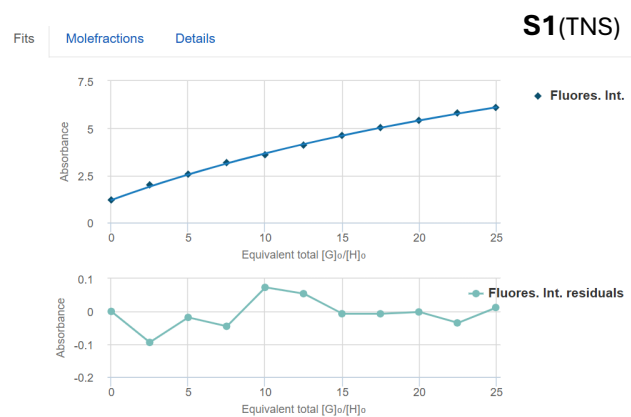

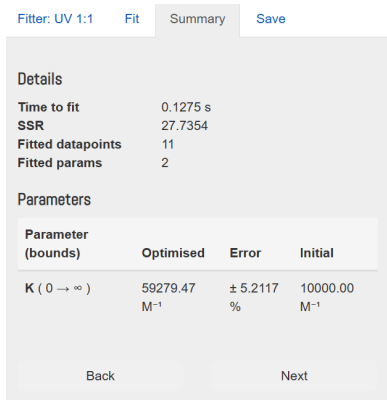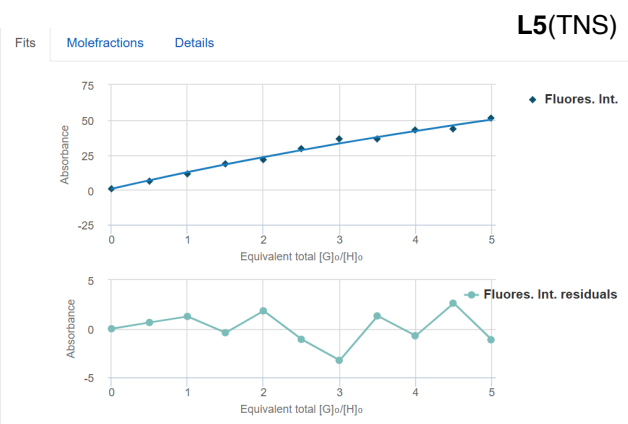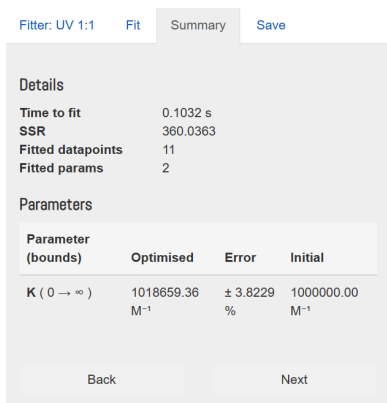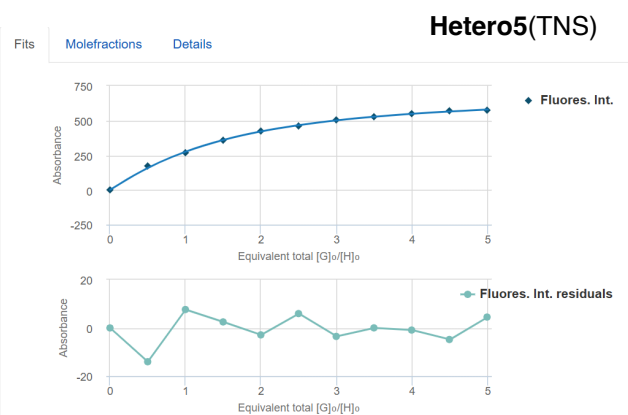

**Fig. S22** Fitting of fluorescence titration data of each host with TNS into 1:1 host-guest model in BindFit software. Screenshots taken from the website [supramolecular.org](http://supramolecular.org).

Fitter: UV 1:1   Fit   Summary   Save

**Details**

Time to fit      0.1222 s  
 SSR              1.3817e-7  
 Fitted datapoints   11  
 Fitted params      2

**Parameters**

| Parameter (bounds) | Optimised                 | Error         | Initial                   |
|--------------------|---------------------------|---------------|---------------------------|
| K ( 0 → ∞ )        | 301.58<br>M <sup>-1</sup> | ± 1.0485<br>% | 100.00<br>M <sup>-1</sup> |

Back

Next

### L1(C-Dab)

Fits   Molefractions   Details

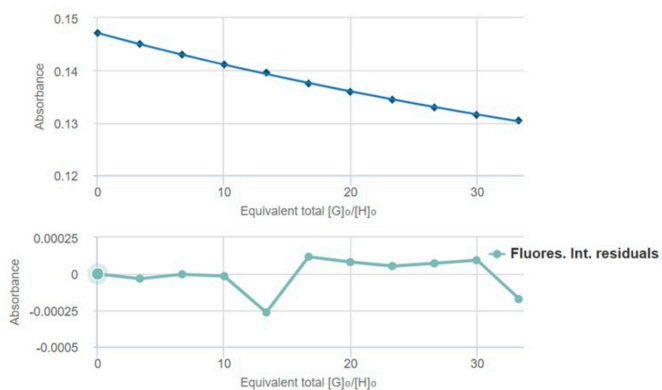

Fitter: UV 1:1   Fit   Summary   Save

**Details**

Time to fit      0.1297 s  
 SSR              2.8240e-7  
 Fitted datapoints   11  
 Fitted params      2

**Parameters**

| Parameter (bounds) | Optimised                 | Error         | Initial                   |
|--------------------|---------------------------|---------------|---------------------------|
| K ( 0 → ∞ )        | 673.53<br>M <sup>-1</sup> | ± 1.2375<br>% | 100.00<br>M <sup>-1</sup> |

Back

Next

### S1(C-Dab)

Fits   Molefractions   Details

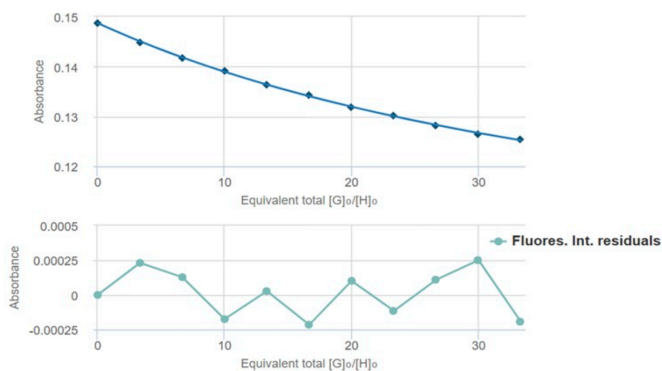



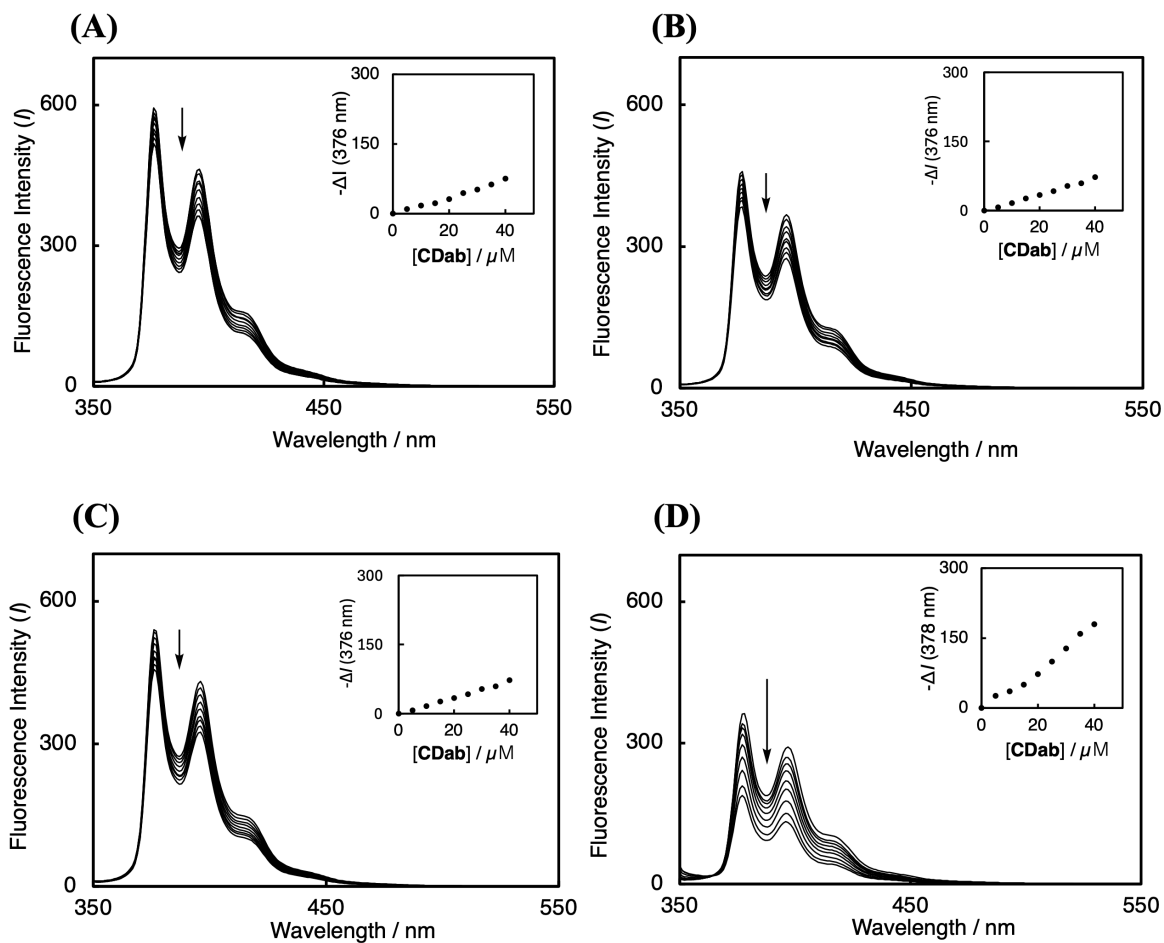

**Fig. S24** Fluorescence spectral changes of PBA (0.5  $\mu\text{M}$ ) upon the addition of CDab in the (A) absence and presence of (B) L1 (50  $\mu\text{M}$ ), (C) S1 (50  $\mu\text{M}$ ) and (D) L5 (10  $\mu\text{M}$ ) in aqueous HEPES buffer (0.01 M, pH 7.4, 0.15 M with NaCl) at 298K. The corresponding titration curves. Ex 341 nm.
